# Supplementary material for: Relationships between Sleep Quality, Introspective Accuracy, and Confidence Differ among People with Schizophrenia, Schizoaffective Disorder, and Bipolar Disorder with Psychotic Features
Source: MDPI journal article supplement (doi:10.3390/bs14030192), 2024-02-28
Supplement: s1 [file s1]

**Supplemental Table S1**

Average sleep quality scores and group comparisons between Non-SI and SI groups

|                  | <b>Non-SI</b><br>( <i>n</i> = 95) | <b>SI</b><br>( <i>n</i> = 83) |                         |
|------------------|-----------------------------------|-------------------------------|-------------------------|
|                  | <i>M</i> ( <i>SD</i> )            | <i>M</i> ( <i>SD</i> )        | <i>t</i>                |
| PSQI Total       | 8.83 (4.23)                       | 10.04 (3.96)                  | -1.95, <i>p</i> = 0.05  |
| PSQI Component 1 | 1.11 (0.92)                       | 1.52 (0.94)                   | -2.96, <i>p</i> = 0.004 |
| PSQI Component 2 | 1.74 (1.07)                       | 1.64 (1.04)                   | 0.62, <i>p</i> = 0.54   |
| PSQI Component 3 | 0.78 (0.99)                       | 1.10 (1.19)                   | -1.92, <i>p</i> = 0.06  |
| PSQI Component 4 | 1.09 (1.12)                       | 0.85 (1.11)                   | 1.37, <i>p</i> = 0.17   |
| PSQI Component 5 | 1.42 (0.66)                       | 1.66 (0.75)                   | -2.28, <i>p</i> = 0.02  |
| PSQI Component 6 | 1.29 (1.37)                       | 1.39 (1.37)                   | -0.44, <i>p</i> = 0.66  |
| PSQI Component 7 | 1.25 (1.00)                       | 1.40 (0.90)                   | -1.01, <i>p</i> = 0.31  |

Note. Non-SI = non-suicidal group; SI = actively suicidal group; PSQI Total = Global PSQI Score; PSQI Component 1 = Subjective sleep quality; PSQI Component 2 = Sleep latency; PSQI Component 3 = Sleep duration; PSQI Component 4 = Sleep efficiency; PSQI Component 5 = Sleep disturbances; PSQI Component 6 = Use of sleeping medication; PSQI Component 7 = Daytime dysfunction
